# Supplementary material
Source: publisher figshare collection journal article supplement (https://gsajournals.figshare.com/ndownloader/files/13211990)
Supplement: Supplementary file 1 [file 13211990]

Suppl. Fig. 1. Size distribution among removed duplicated and potentially redundant scaffolds. Insert histogram shows size distribution of those scaffolds ≤ 25 Kb.
